# Supplementary material for: Unravelling the hydrogen absorption process in Pd overlayers on a Au(111) surface
Source: Royal Society of Chemistry journal article supplement (doi:10.1039/c5cp06443k), 2016-01-01
Supplement: c5cp06443k1.pdf [file c5cp06443k1.pdf]

# Unravelling the hydrogen absorption process in Pd overlayers on a Au(111) surface

Paola M. Quaino,<sup>\*,†</sup> Renat Nazmutdinov,<sup>‡</sup> Leonardo F. Peiretti,<sup>†</sup> and Elizabeth  
Santos<sup>¶,§</sup>

<sup>†</sup>*PRELINE, Fac. de Ing. Química, Universidad Nacional del Litoral, 3000 Santa Fe,  
Argentina*

<sup>‡</sup>*Kazan National Research Technological University, 420015 Kazan, Russian Federation*

<sup>¶</sup>*Institute of Theoretical Chemistry, Ulm University, D-89069 Ulm, Germany*

<sup>§</sup>*Facultad de Matemáticas, Astronomía y Física, IFEG-CONICET, UNC, Argentina*

E-mail: pquaino@fiq.unl.edu.ar

**Supporting material**

**Kinetics and Reaction Paths for the Absorption of Hydrogen**

a) Scenario A: Subsurface penetration of adsorbed hydrogen

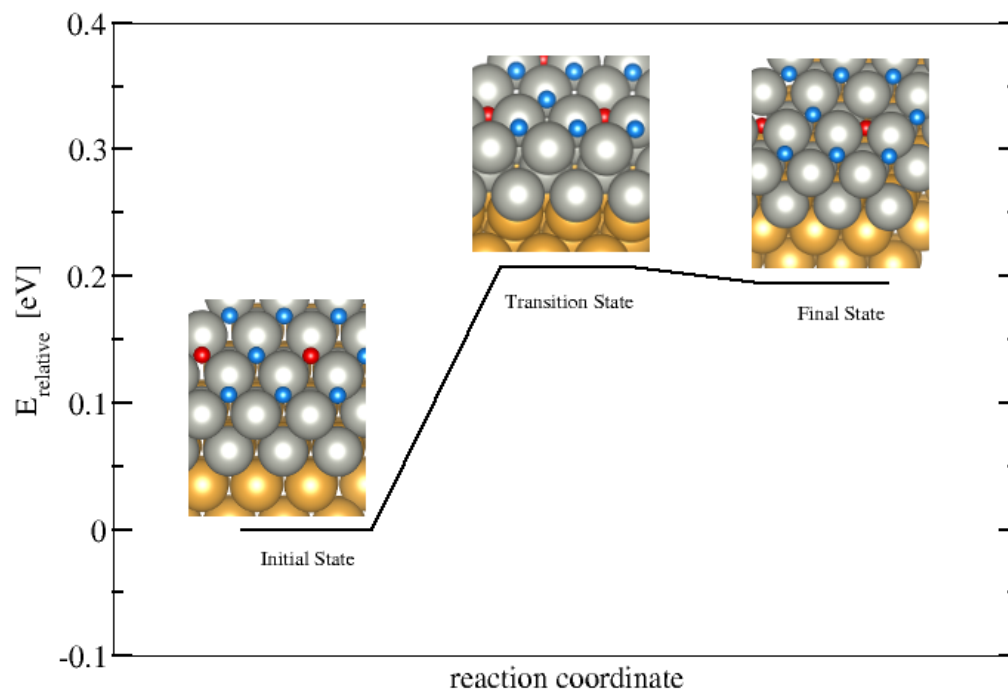

Figure 1: Reaction scheme for the hydrogen subsurface penetration from a monolayer of pre-adsorbed hydrogen or the well known  $H_{UPD}$ . Initial, transition and final states are shown. Each type of atom are represented in different colors: H (light blue), Pd(grey) and Au(yellow).

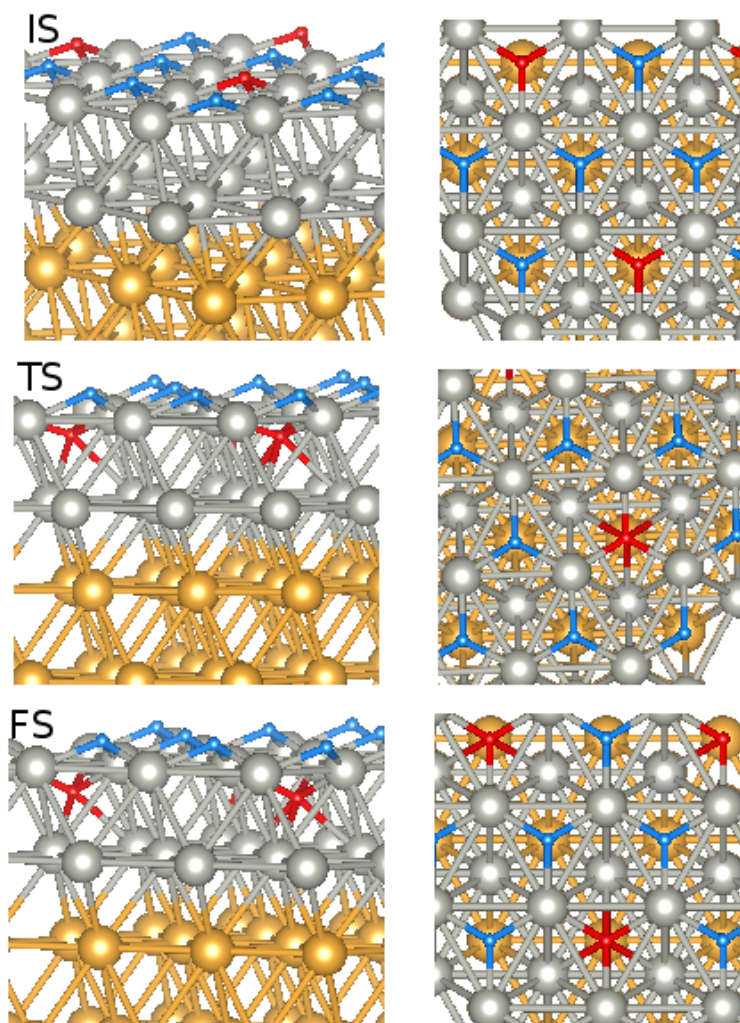

Figure 2: Initial, transition and final states for the scenario A. Each type of atom are represented in different colors: H (light blue), Pd(grey) and Au(yellow). Top and side views of the initial (IS), transition (TS) and final (FS) states are shown in ball-and-stick model.

b) Scenario B: Approach and subsurface penetration of a  $H_2$  molecule

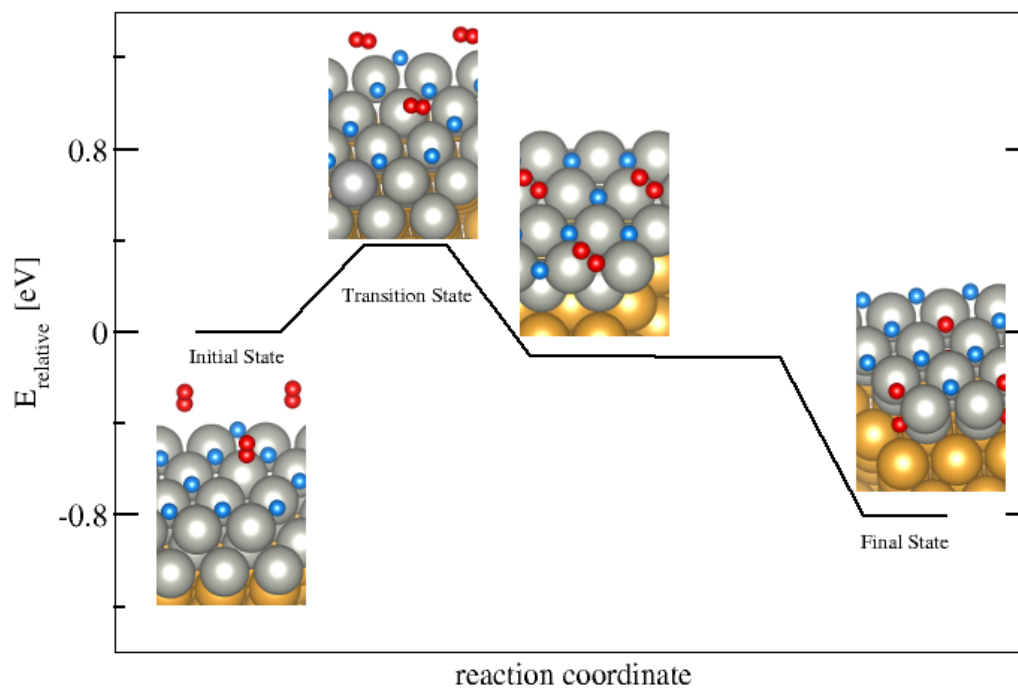

Figure 3: Reaction scheme for the hydrogen subsurface penetration upon  $H_2$  adsorption and bond breaking. Initial, transition and final states are shown. Each type of atom are represented in different colors: H (light blue),  $H_2$  molecule (red), Pd (grey) and Au (yellow).

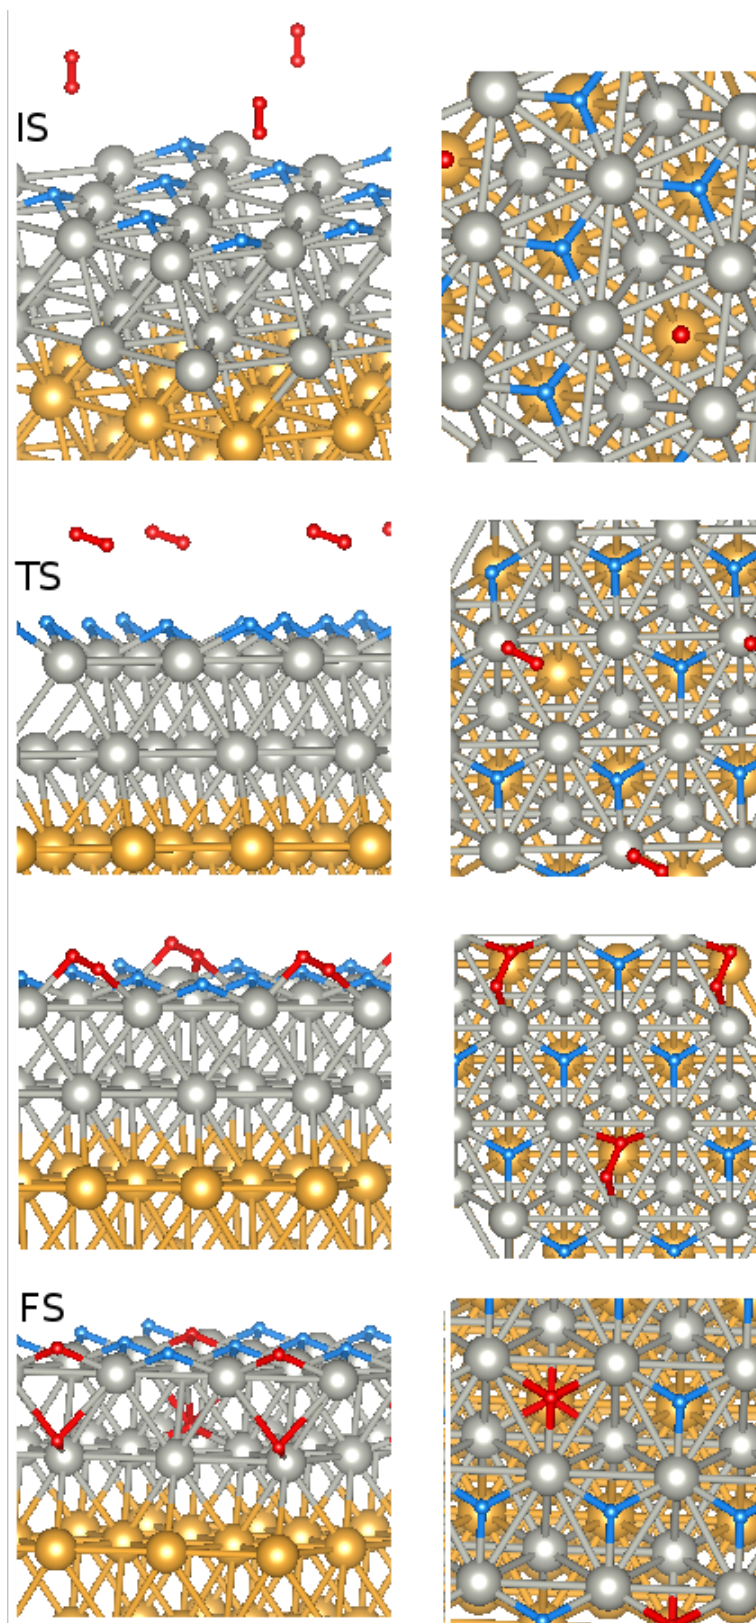

Figure 4: Initial, transition and final states for scenario B. Each type of atom are represented in different colors: H (light blue), H molecule (red), Pd(grey) and Au(yellow). Top and side views of the initial (IS), transition (TS) and final (FS) states are shown in ball-and-stick model.
